# Supplementary material
Source: PubMed Central journal article supplement (PMC8266579)
Supplement: sbab015_suppl_supplementary_material.pdf [file sbab015_suppl_supplementary_material.pdf]

# Supplementary Material

## Table of Contents

|                                                                                                                        |    |
|------------------------------------------------------------------------------------------------------------------------|----|
| <i>DWI processing</i> .....                                                                                            | 2  |
| <i>Supplementary Figure 1. Centrality measures across thresholds.</i> .....                                            | 3  |
| <i>Supplementary Figure 2. Correlation matrix (network) of symptoms in schizophrenia</i> .....                         | 4  |
| <i>Supplementary Figure 3. Symptom comorbidity network without substance use items.</i> .....                          | 5  |
| <i>Supplementary Figure 4. Beta weight frequency across repetitions of the 10-fold cross validation analyses</i> ..... | 6  |
| <i>Supplementary Table 1.1 Symptom items included in network construction</i> .....                                    | 7  |
| <i>Supplementary Table 1.2 Symptom abbreviations corresponding to Figure 2 (main text)</i> .....                       | 8  |
| <i>Supplementary Table 2. Similarity in betweenness centrality across sites</i> .....                                  | 13 |
| <i>Supplementary Table 3. Similarity in closeness centrality across sites</i> .....                                    | 13 |
| <i>Supplementary Table 4. Similarity in degree centrality across sites</i> .....                                       | 13 |
| <i>Supplementary Table 5. Similarity in centrality measures across males and females</i> .....                         | 13 |
| <i>Supplementary Table 6. Similarity between the LASSO network and Pearson network.</i> .....                          | 13 |
| <i>Supplementary Table 7. Cohen's d effect size for each between-group comparison</i> .....                            | 14 |
| <i>Supplementary Table 8. GLM results across different thresholds to define ranked symptoms as 'severe'</i> .....      | 14 |
| <i>Exploring the potential confound of study site</i> .....                                                            | 15 |

## DWI processing

DWI processed data were taken from a prior study, methods for which are described in detail elsewhere (ref). In brief, DWIs were pre-processed with FMRIB Software Library (FSL, version 5.11) <sup>32</sup>. This involved i) visual inspection for artifacts and removal of four scans due to poor image quality, ii) correction for motion and gradient-induced eddy currents <sup>33, 34</sup> ; and, iii) computation of fractional anisotropy (FA) volumes by fitting a single-diffusion tensor to the harmonized DWIs.

ENIGMA-DTI protocols (<http://enigma.ini.usc.edu/protocols/dti-protocols/>) were used to extract average FA estimates from voxels on a white matter skeleton <sup>35</sup>. First, ANTs (<http://stnava.github.io/ANTs/>) was used to nonlinearly register FA maps to the common ENIGMA-DTI target, derived from 400 adult brains <sup>35</sup>. Second, individually registered brains were projected onto the ENIGMA-DTI white matter skeleton with FSL's tract-based spatial statistics (*TBSS*) <sup>36</sup>, which was employed to alleviate any residual misalignment error. Resulting skeletonized FA maps were used to extract values from a subset of white matter regions comprising the JHU white matter atlas (48 regions). To define each region of interest (ROI), FA was averaged over skeleton-voxels traversing a given atlas region. Statistical inference was performed on the resulting skeletonized ROIs.

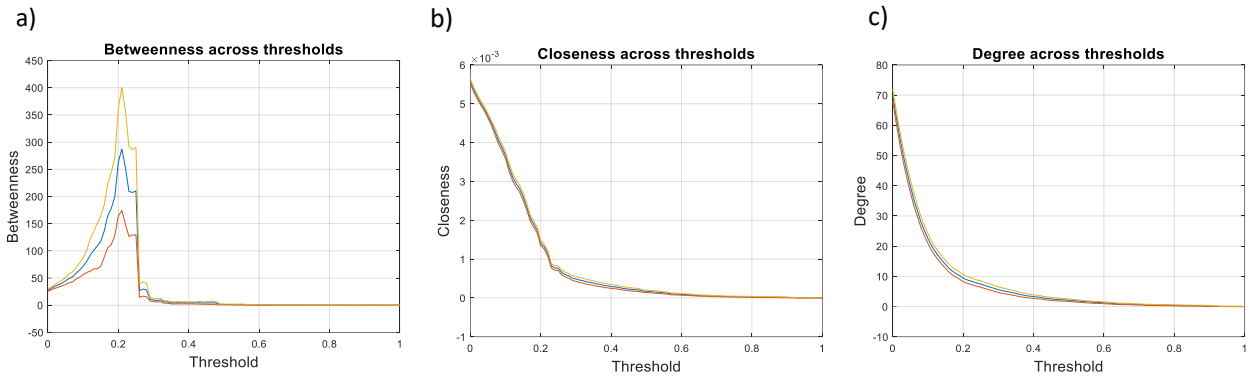

**Supplementary Figure 1. Centrality measures across thresholds.** The impact of network thresholding on centrality estimates, including degree, closeness and betweenness. Increasing the correlation threshold (vertical axis) resulted in lower degree (a) and closeness (b). Whereas, betweenness peaked at a threshold around  $r=.2$  and declined thereafter. The lines represent the mean (blue) and standard deviation (yellow) across all symptom items.

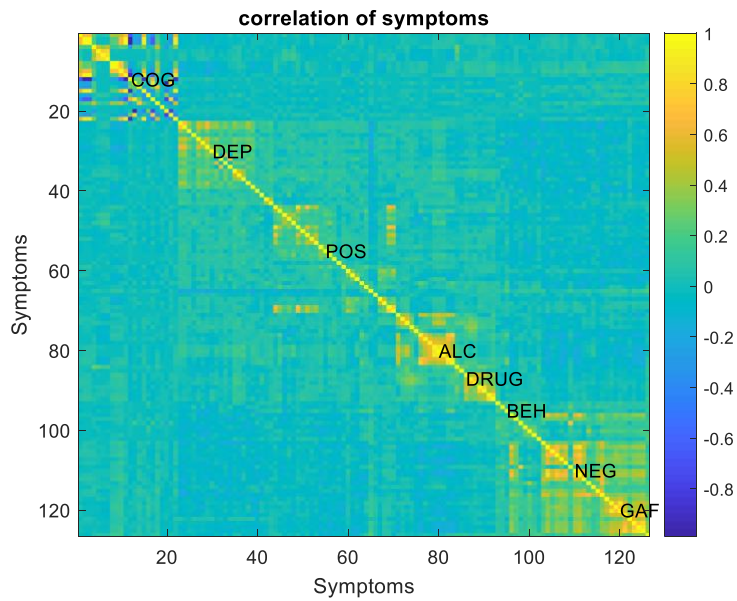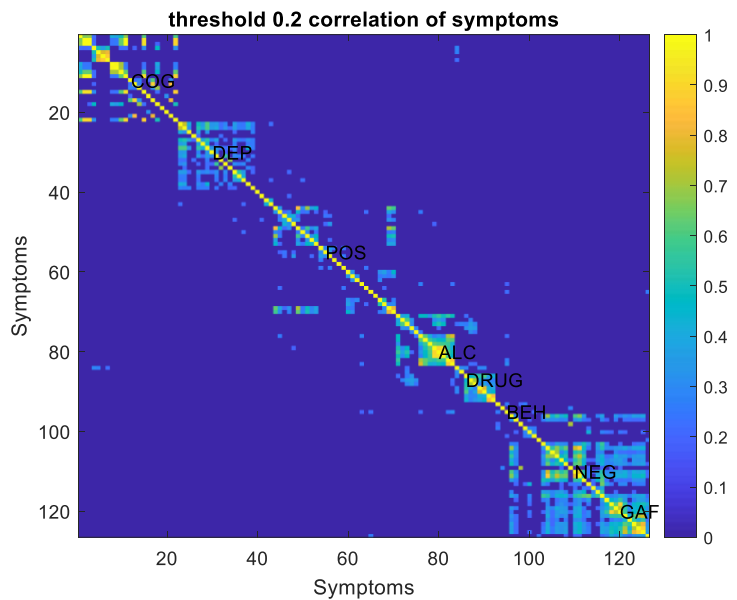

**Supplementary Figure 2. Correlation matrix (network) of symptoms in schizophrenia.** A total of 126 symptoms from all subjects were used to construct symptom correlation matrices. Each cell in the matrix quantifies the relationship between a pair of symptoms. The network was constructed using (a) the raw correlation coefficients, which were (b) thresholded to remove weak/spurious connections (0.2 is the threshold where all the symptoms in the network exhibit the highest betweenness). Symptom associations were characterized by both negative correlations (blue), and positive correlations (yellow). **Abbreviations.** COG: cognitive symptoms; GAF: General Assessment of Functioning Scale; NEG: Negative symptoms; BEH: behavior affect symptoms; ALC: alcohol drug abuse; POS: positive symptoms; DEP: depressive symptoms.

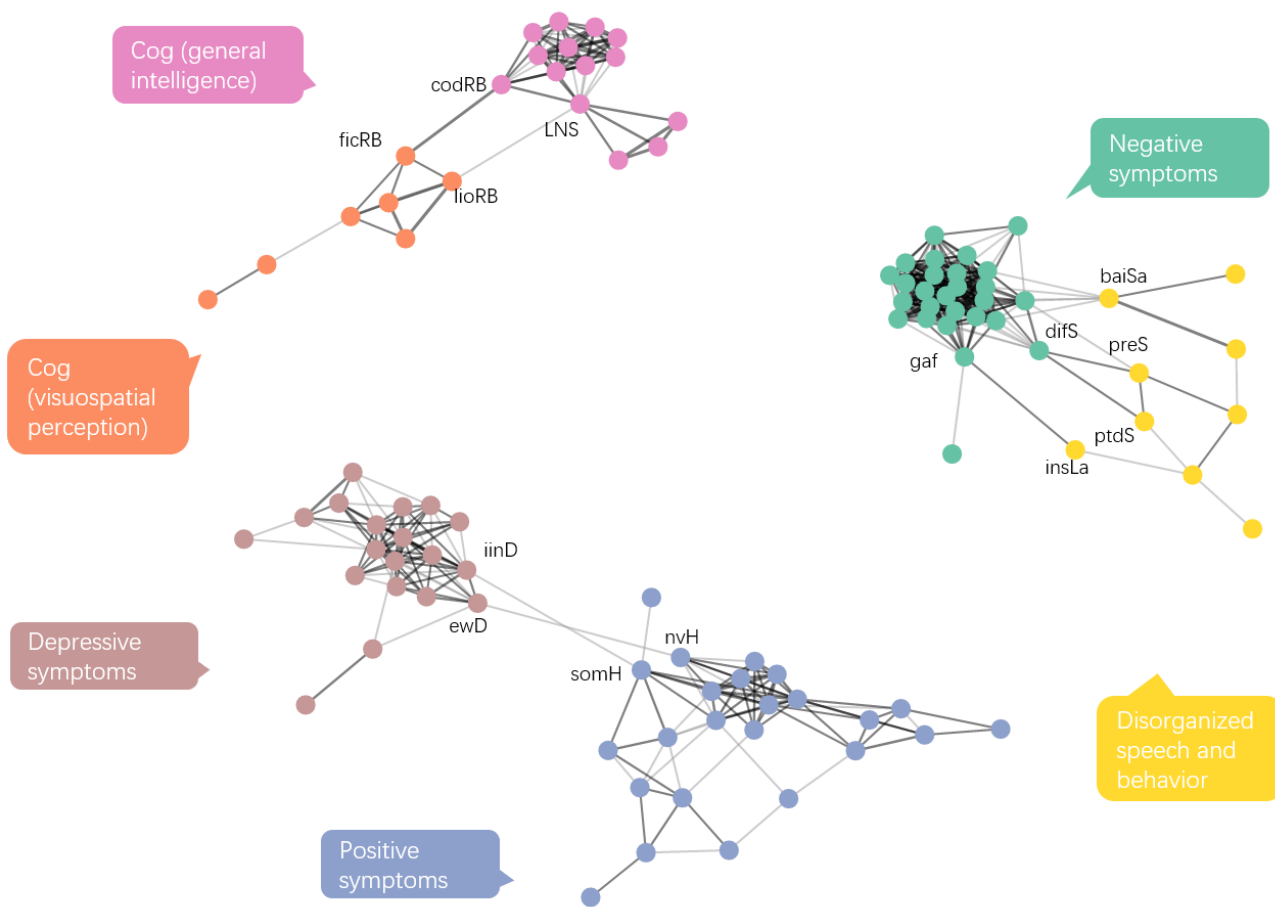

**Supplementary Figure 3. Symptom comorbidity network without substance use items.** Circles represent nodes (symptoms), and lines represent associations between symptom pairs, where thicker lines indicate stronger correlations. The network layout is force-directed, whereby distant variables are weakly correlated and adjacent variables are strongly correlated. Modularity analysis yielded 6 symptom modules: negative symptoms (green), positive symptoms (blue), depressive symptoms (brown), disorganized speech and behavior (yellow), cognition - intelligence (violet) and cognition - visuospatial perception (orange). Refer to Supplementary Table 1 for specific item names. As shown, omitting substance use items removed between-module connections representing substance use items in the original network, while preserving local (within module) network structure. These results confirm the centrality of substance use items in a schizophrenia symptom network and demonstrates network stability between symptom networks computed with and without substance use/abuse items.

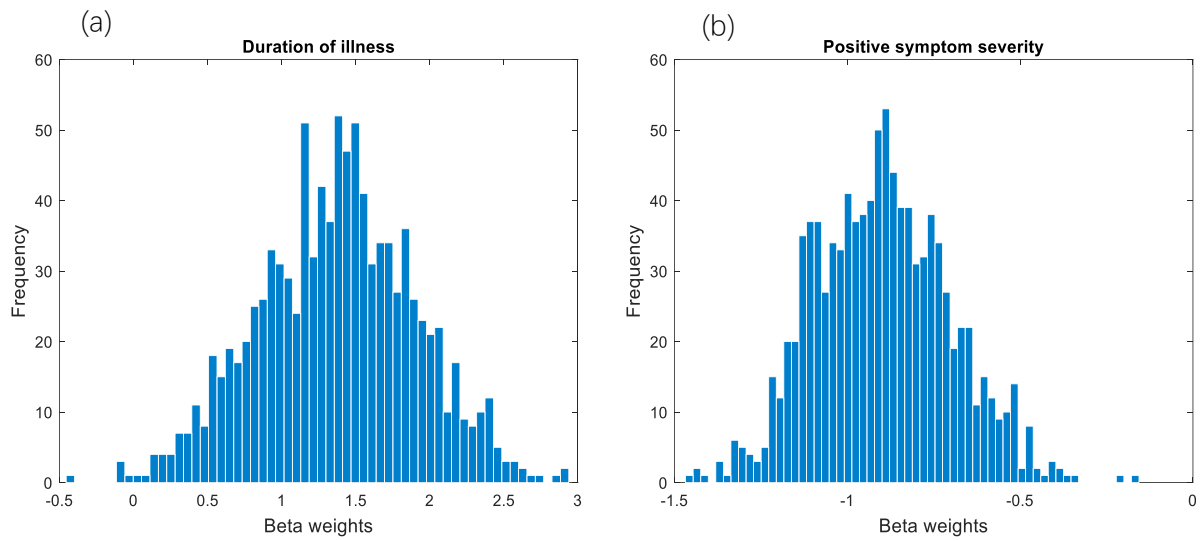

**Supplementary Figure 4. Beta weight frequency across repetitions of the 10-fold cross validation analyses.** Histograms present beta weight frequency across 1000 repetitions of the 10-fold cross validation analyses evaluating associations between the number of connected components with duration of illness (a) and with positive symptom severity (b). Results from the 10-fold cross validation suggest that the association between duration of illness and the number of connected components is significant in 42.4% out of 1000 repetitions, whereas the association between psychosis severity and number of connected components is significant in 96.8% out of 1000 repetitions.

Supplementary Table 1.1 Symptom items included in network construction

| Scale                                                                  | Symptom/s assessed                                                                                                                                                                                                   |
|------------------------------------------------------------------------|----------------------------------------------------------------------------------------------------------------------------------------------------------------------------------------------------------------------|
| Diagnostic Interview for psychosis (DIP)                               | Social functioning and disability, psychosis (positive and negative symptoms), patterns of service utilization and patient-perceived need for services, as well as drug use (emphasis on alcohol use and tolerance). |
| Wechsler Abbreviated Scale of Intelligence (WASI)                      | Verbal, nonverbal, and general cognitive functioning.                                                                                                                                                                |
| WTAR (Wechsler Test of Adult Reading)                                  | Premorbid IQ and memory performance.                                                                                                                                                                                 |
| COWAT (Controlled Oral Word Association Test)                          | Verbal fluency.                                                                                                                                                                                                      |
| LNS (Letter Number Sequencing)                                         | Verbal working memory                                                                                                                                                                                                |
| RBANS (Repeatable Battery for Assessment of Neuropsychological Status) | Cognitive performance across 5 domains: memory (immediate and delayed), visuospatial function, language (semantic Fluency) and attention.                                                                            |
| SANS (Scale for Assessment of Negative Symptoms)                       | Five aspects of negative symptoms: alogia, affective blunting, avolition-apathy, anhedonia-asociality, and attentional impairment.                                                                                   |
| GAF (Global Assessment Functioning)                                    | The degree to which an individual's symptoms affect their day-to-day life.                                                                                                                                           |

Supplementary Table 1.2 Symptom abbreviations corresponding to Figure 2 (main text)

| Items Included                           | Modules | Abbreviation | Symptom scales                                                         |
|------------------------------------------|---------|--------------|------------------------------------------------------------------------|
| USA standard IQ score*                   | 9       | usWT         | WTAR (Wechsler Test of Adult Reading)                                  |
| Vocab                                    | 9       | vocWA        | WASI (Wechsler Abbreviated Scale of Intelligence)                      |
| Matrix reasoning                         | 9       | mrWA         | WASI (Wechsler Abbreviated Scale of Intelligence)                      |
| IQ score                                 | 9       | iqWA         | WASI (Wechsler Abbreviated Scale of Intelligence)                      |
| LNS                                      | 9       | LNS          | LNS (Letter Number Sequencing)                                         |
| Naming words starting with F             | 9       | wsfCO        | COWAT (Controlled Oral Word Association Test)                          |
| Naming words starting with A             | 9       | wsaCO        | COWAT (Controlled Oral Word Association Test)                          |
| Naming words starting with S             | 9       | wssCO        | COWAT (Controlled Oral Word Association Test)                          |
| List total (list learning + list recall) | 9       | lisRB        | RBANS (Repeatable Battery for Assessment of Neuropsychological Status) |
| Story memory                             | 8       | stoRB        | RBANS (Repeatable Battery for Assessment of Neuropsychological Status) |
| Figure copy                              | 8       | ficRB        | RBANS (Repeatable Battery for Assessment of Neuropsychological Status) |
| Line orientation                         | 8       | lioRB        | RBANS (Repeatable Battery for Assessment of Neuropsychological Status) |
| Picture                                  | 9       | picRB        | RBANS (Repeatable Battery for Assessment of Neuropsychological Status) |
| Semantic fluency                         | 8       | sefRB        | RBANS (Repeatable Battery for Assessment of Neuropsychological Status) |
| Digit                                    | 8       | digRB        | RBANS (Repeatable Battery for Assessment of Neuropsychological Status) |
| Coding                                   | 9       | codRB        | RBANS (Repeatable Battery for Assessment of Neuropsychological Status) |
| List recognition                         | 8       | lirRB        | RBANS (Repeatable Battery for Assessment of Neuropsychological Status) |
| Story recall                             | 8       | strRB        | RBANS (Repeatable Battery for Assessment of Neuropsychological Status) |
| Figure recall                            | 9       | firRB        | RBANS (Repeatable Battery for Assessment of Neuropsychological Status) |
| Dysphoria                                | 11      | dysD         | DIP depression (Diagnostic Interview for Psychosis)                    |
| Pleasure loss                            | 11      | ploD         | DIP depression (Diagnostic Interview for Psychosis)                    |
| Suicidal thoughts                        | 11      | suiD         | DIP depression (Diagnostic Interview for Psychosis)                    |
| Diurnal activities                       | 11      | diuD         | DIP depression (Diagnostic Interview for Psychosis)                    |
| Poor concentration                       | 11      | pcoD         | DIP depression (Diagnostic Interview for Psychosis)                    |
| Activity levels                          | 11      | sacD         | DIP depression (Diagnostic Interview for Psychosis)                    |
| Energy levels                            | 11      | loeD         | DIP depression (Diagnostic Interview for Psychosis)                    |
| Libido                                   | 11      | libD         | DIP depression (Diagnostic Interview for Psychosis)                    |
| Poor appetite                            | 11      | paD          | DIP depression (Diagnostic Interview for Psychosis)                    |
| Increased appetite                       | 11      | inaD         | DIP depression (Diagnostic Interview for Psychosis)                    |
| Weight loss                              | 11      | wloD         | DIP depression (Diagnostic Interview for Psychosis)                    |
| Weight gain                              | 11      | wgaD         | DIP depression (Diagnostic Interview for Psychosis)                    |
| Insomnia (early in the night)            | 11      | iinD         | DIP depression (Diagnostic Interview for Psychosis)                    |
| Insomnia (middle of the night)           | 11      | minD         | DIP depression (Diagnostic Interview for Psychosis)                    |
| Early waking                             | 11      | ewD          | DIP depression (Diagnostic Interview for Psychosis)                    |
| Excessive sleep                          | 11      | esD          | DIP depression (Diagnostic Interview for Psychosis)                    |
| Excessive self-guilt                     | 11      | esgD         | DIP depression (Diagnostic Interview for Psychosis)                    |
| Nihilistic                               | 10      | denD         | DIP depression (Diagnostic Interview for Psychosis)                    |
| Elevated mood                            | 11      | elMa         | DIP mania (Diagnostic Interview for Psychosis)                         |
| Irritable mood                           | 11      | irMa         | DIP mania (Diagnostic Interview for Psychosis)                         |
| Auditory                                 | 10      | auH          | DIP hallucination (Diagnostic Interview for Psychosis)                 |
| Visual                                   | 10      | viH          | DIP hallucination (Diagnostic Interview for Psychosis)                 |
| Olfactory                                | 10      | olfH         | DIP hallucination (Diagnostic Interview for Psychosis)                 |
| Somatic                                  | 10      | somH         | DIP hallucination (Diagnostic Interview for Psychosis)                 |
| Sexual                                   | 10      | she          | DIP hallucination (Diagnostic Interview for Psychosis)                 |
| All modalities                           | 10      | amH          | DIP hallucination (Diagnostic Interview for Psychosis)                 |
| Nonverbal                                | 10      | nvH          | DIP hallucination (Diagnostic Interview for Psychosis)                 |
| Abusive                                  | 10      | abH          | DIP hallucination (Diagnostic Interview for Psychosis)                 |
| Commentary                               | 10      | comH         | DIP hallucination (Diagnostic Interview for Psychosis)                 |
| Third person                             | 10      | tpH          | DIP hallucination (Diagnostic Interview for Psychosis)                 |
| Insertion                                | 10      | insT         | DIP Subjective thought disorder (Diagnostic Interview for Psychosis)   |
| Broadcasting                             | 10      | broT         | DIP Subjective thought disorder (Diagnostic Interview for Psychosis)   |
| Withdrawal                               | 10      | wiT          | DIP Subjective thought disorder (Diagnostic Interview for Psychosis)   |
| Echolalia                                | 10      | echT         | DIP Subjective thought disorder (Diagnostic Interview for Psychosis)   |



|                                                                  |    |        |                                                             |
|------------------------------------------------------------------|----|--------|-------------------------------------------------------------|
| <b>Passivity</b>                                                 | 10 | paDe   | DIP delusion (Diagnostic Interview for Psychosis)           |
| <b>Persecutory</b>                                               | 10 | pscDe  | DIP delusion (Diagnostic Interview for Psychosis)           |
| <b>Influence</b>                                                 | 10 | infDe  | DIP delusion (Diagnostic Interview for Psychosis)           |
| <b>Perception</b>                                                | 10 | perDe  | DIP delusion (Diagnostic Interview for Psychosis)           |
| <b>Grandiose</b>                                                 | 1  | graDe  | DIP delusion (Diagnostic Interview for Psychosis)           |
| <b>Bizarre</b>                                                   | 10 | bizDe  | DIP delusion (Diagnostic Interview for Psychosis)           |
| <b>Lack of insight</b>                                           | 3  | insLa  | DIP insight (Diagnostic Interview for Psychosis)            |
| <b>Organized delusions</b>                                       | 10 | orgPs  | DIP psychotic symptoms (Diagnostic Interview for Psychosis) |
| <b>Widespread delusions</b>                                      | 10 | wsPs   | DIP psychotic symptoms (Diagnostic Interview for Psychosis) |
| <b>one week (Delusions and concurrent hallucinations period)</b> | 10 | owPs   | DIP psychotic symptoms (Diagnostic Interview for Psychosis) |
| <b>Jealous delusions</b>                                         | 10 | jePs   | DIP psychotic symptoms (Diagnostic Interview for Psychosis) |
| <b>Alcohol – ever used</b>                                       | 1  | aleAlc | DIP alcohol (Diagnostic Interview for Psychosis)            |
| <b>Frequency of alcohol use</b>                                  | 1  | freAlc | DIP alcohol (Diagnostic Interview for Psychosis)            |
| <b>Heavier frequency (6 or more drinks /time)</b>                | 1  | hfAlc  | DIP alcohol (Diagnostic Interview for Psychosis)            |
| <b>Difficulty reducing alcohol use</b>                           | 1  | cdAlc  | DIP alcohol (Diagnostic Interview for Psychosis)            |
| <b>Guilt associated with alcohol use</b>                         | 1  | gtAlc  | DIP alcohol (Diagnostic Interview for Psychosis)            |
| <b>Criticism associated with alcohol use</b>                     | 1  | criAlc | DIP alcohol (Diagnostic Interview for Psychosis)            |
| <b>Morning alcohol consumption</b>                               | 1  | mrAlc  | DIP alcohol (Diagnostic Interview for Psychosis)            |
| <b>Risk taking to acquire alcohol</b>                            | 1  | rtAlc  | DIP alcohol (Diagnostic Interview for Psychosis)            |
| <b>Craving</b>                                                   | 1  | craAlc | DIP alcohol (Diagnostic Interview for Psychosis)            |
| <b>Capacity to control alcohol intake</b>                        | 1  | ctcAlc | DIP alcohol (Diagnostic Interview for Psychosis)            |
| <b>Tolerance</b>                                                 | 1  | tlrAlc | DIP alcohol (Diagnostic Interview for Psychosis)            |
| <b>Withdrawal problems</b>                                       | 1  | wpAlc  | DIP alcohol (Diagnostic Interview for Psychosis)            |
| <b>Social legal problems</b>                                     | 1  | slpAlc | DIP alcohol (Diagnostic Interview for Psychosis)            |
| <b>Drugs ever used</b>                                           | 1  | dreDr  | DIP drug (Diagnostic Interview for Psychosis)               |
| <b>Tobacco ever used</b>                                         | 1  | tbeDr  | DIP drug (Diagnostic Interview for Psychosis)               |
| <b>Drug abuse</b>                                                | 1  | abDr   | DIP drug (Diagnostic Interview for Psychosis)               |
| <b>Lifetime alcohol use</b>                                      | 1  | ltaDr  | DIP drug (Diagnostic Interview for Psychosis)               |
| <b>Psychopathology linked to alcohol use</b>                     | 1  | ppaDr  | DIP drug (Diagnostic Interview for Psychosis)               |
| <b>Lifetime cannabis use</b>                                     | 1  | ltcDr  | DIP drug (Diagnostic Interview for Psychosis)               |
| <b>Psychopathology linked to cannabis use</b>                    | 1  | ppcDr  | DIP drug (Diagnostic Interview for Psychosis)               |
| <b>Lifetime use of other drugs</b>                               | 1  | ltoDr  | DIP drug (Diagnostic Interview for Psychosis)               |
| <b>Psychopathology linked to other drugs</b>                     | 1  | ppoDr  | DIP drug (Diagnostic Interview for Psychosis)               |
| <b>Agitated</b>                                                  | 2  | agiBe  | DIP behavior affect (Diagnostic Interview for Psychosis)    |
| <b>Catatonia</b>                                                 | 2  | cttBe  | DIP behavior affect (Diagnostic Interview for Psychosis)    |
| <b>Bizarre</b>                                                   | 1  | bizBe  | DIP behavior affect (Diagnostic Interview for Psychosis)    |
| <b>Restricted</b>                                                | 3  | reBe   | DIP behavior affect (Diagnostic Interview for Psychosis)    |
| <b>Blunted</b>                                                   | 3  | bluBe  | DIP behavior affect (Diagnostic Interview for Psychosis)    |
| <b>Inappropriate</b>                                             | 2  | inaBe  | DIP behavior affect (Diagnostic Interview for Psychosis)    |
| <b>Speech pressure</b>                                           | 2  | preS   | DIP speech (Diagnostic Interview for Psychosis)             |
| <b>Speech difficulties</b>                                       | 3  | difS   | DIP speech (Diagnostic Interview for Psychosis)             |
| <b>Speech - positive thought disorder</b>                        | 2  | ptdS   | DIP speech (Diagnostic Interview for Psychosis)             |
| <b>Speech incoherence</b>                                        | 3  | ichS   | DIP speech (Diagnostic Interview for Psychosis)             |
| <b>Speech – negative thought disorder</b>                        | 3  | ntdS   | DIP speech (Diagnostic Interview for Psychosis)             |
| <b>Blunted affect – facial expression</b>                        | 3  | bafSa  | SANS (Scale for Assessment of Negative Symptoms)            |
| <b>Blunted affect – spontaneous movement</b>                     | 3  | basSa  | SANS (Scale for Assessment of Negative Symptoms)            |
| <b>Blunted affect – gestures</b>                                 | 3  | bagSa  | SANS (Scale for Assessment of Negative Symptoms)            |
| <b>Blunted affect – eye contact</b>                              | 3  | baeSa  | SANS (Scale for Assessment of Negative Symptoms)            |
| <b>Blunted affect – responsivity</b>                             | 3  | banSa  | SANS (Scale for Assessment of Negative Symptoms)            |
| <b>Blunted affect – inappropriate</b>                            | 2  | baiSa  | SANS (Scale for Assessment of Negative Symptoms)            |
| <b>Blunted affect – vocal inflections</b>                        | 3  | bavSa  | SANS (Scale for Assessment of Negative Symptoms)            |
| <b>Blunted affect – overall</b>                                  | 3  | baSa   | SANS (Scale for Assessment of Negative Symptoms)            |
| <b>Alogia – speech poverty</b>                                   | 3  | alpSa  | SANS (Scale for Assessment of Negative Symptoms)            |
| <b>Alogia – speech content</b>                                   | 3  | alcSa  | SANS (Scale for Assessment of Negative Symptoms)            |
| <b>Alogia – blocking</b>                                         | 3  | albSa  | SANS (Scale for Assessment of Negative Symptoms)            |

|                                                 |                |                     |                                                                        |
|-------------------------------------------------|----------------|---------------------|------------------------------------------------------------------------|
| <b>Alogia – latency response</b>                | 3              | allSa               | SANS (Scale for Assessment of Negative Symptoms)                       |
| <b>Alogia – overall</b>                         | 3              | aloSa               | SANS (Scale for Assessment of Negative Symptoms)                       |
| <b>Avolition – grooming</b>                     | 3              | avgSa               | SANS (Scale for Assessment of Negative Symptoms)                       |
| <b>Avolition – persistence</b>                  | 3              | aviSa               | SANS (Scale for Assessment of Negative Symptoms)                       |
| <b>Avolition – physical anergia</b>             | 3              | avpSa               | SANS (Scale for Assessment of Negative Symptoms)                       |
| <b>Avolition – overall</b>                      | 3              | avoSa               | SANS (Scale for Assessment of Negative Symptoms)                       |
| <b>Asociality – recreational</b>                | 3              | asrSa               | SANS (Scale for Assessment of Negative Symptoms)                       |
| <b>Asociality – sexual/activity</b>             | 3              | assSa               | SANS (Scale for Assessment of Negative Symptoms)                       |
| <b>Asociality – intimacy</b>                    | 3              | asiSa               | SANS (Scale for Assessment of Negative Symptoms)                       |
| <b>Asociality – relationships</b>               | 3              | areSa               | SANS (Scale for Assessment of Negative Symptoms)                       |
| <b>Asociality – overall</b>                     | 3              | asoSa               | SANS (Scale for Assessment of Negative Symptoms)                       |
| <b>Global functioning score</b>                 | 3              | Gaf                 | GAF (Global Assessment Functioning)                                    |
| <b>Items Included</b>                           | <b>Modules</b> | <b>Abbreviation</b> | <b>Symptom scales</b>                                                  |
| <b>USA standard IQ score*</b>                   | 9              | usWT                | WTAR (Wechsler Test of Adult Reading)                                  |
| <b>Premorbid IQ Score</b>                       | 9              | sWT                 | WTAR (Wechsler Test of Adult Reading)                                  |
| <b>UK Standard IQ score</b>                     | 9              | stWT                | WTAR (Wechsler Test of Adult Reading)                                  |
| <b>Vocab</b>                                    | 9              | vocWA               | WASI (Wechsler Abbreviated Scale of Intelligence)                      |
| <b>Matrix reasoning</b>                         | 9              | mrWA                | WASI (Wechsler Abbreviated Scale of Intelligence)                      |
| <b>IQ score</b>                                 | 9              | iqWA                | WASI (Wechsler Abbreviated Scale of Intelligence)                      |
| <b>LNS</b>                                      | 9              | LNS                 | LNS (Letter Number Sequencing)                                         |
| <b>Naming words starting with F</b>             | 9              | wsfCO               | COWAT (Controlled Oral Word Association Test)                          |
| <b>Naming words starting with A</b>             | 9              | wsaCO               | COWAT (Controlled Oral Word Association Test)                          |
| <b>Naming words starting with S</b>             | 9              | wssCO               | COWAT (Controlled Oral Word Association Test)                          |
| <b>List total (list learning + list recall)</b> | 9              | lisRB               | RBANS (Repeatable Battery for Assessment of Neuropsychological Status) |
| <b>Story memory</b>                             | 8              | stoRB               | RBANS (Repeatable Battery for Assessment of Neuropsychological Status) |
| <b>Figure copy</b>                              | 8              | ficRB               | RBANS (Repeatable Battery for Assessment of Neuropsychological Status) |
| <b>Line orientation</b>                         | 8              | lioRB               | RBANS (Repeatable Battery for Assessment of Neuropsychological Status) |
| <b>Picture</b>                                  | 9              | picRB               | RBANS (Repeatable Battery for Assessment of Neuropsychological Status) |
| <b>Semantic fluency</b>                         | 8              | sefRB               | RBANS (Repeatable Battery for Assessment of Neuropsychological Status) |
| <b>Digit</b>                                    | 8              | digRB               | RBANS (Repeatable Battery for Assessment of Neuropsychological Status) |
| <b>Coding</b>                                   | 9              | codRB               | RBANS (Repeatable Battery for Assessment of Neuropsychological Status) |
| <b>List recognition</b>                         | 8              | lirRB               | RBANS (Repeatable Battery for Assessment of Neuropsychological Status) |
| <b>Story recall</b>                             | 8              | strRB               | RBANS (Repeatable Battery for Assessment of Neuropsychological Status) |
| <b>Figure recall</b>                            | 9              | firRB               | RBANS (Repeatable Battery for Assessment of Neuropsychological Status) |
| <b>Dysphoria</b>                                | 11             | dysD                | DIP depression (Diagnostic Interview for Psychosis)                    |
| <b>Pleasure loss</b>                            | 11             | ploD                | DIP depression (Diagnostic Interview for Psychosis)                    |
| <b>Suicidal thoughts</b>                        | 11             | suiD                | DIP depression (Diagnostic Interview for Psychosis)                    |
| <b>Diurnal activities</b>                       | 11             | diuD                | DIP depression (Diagnostic Interview for Psychosis)                    |
| <b>Poor concentration</b>                       | 11             | pcoD                | DIP depression (Diagnostic Interview for Psychosis)                    |
| <b>Activity levels</b>                          | 11             | sacD                | DIP depression (Diagnostic Interview for Psychosis)                    |
| <b>Energy levels</b>                            | 11             | loeD                | DIP depression (Diagnostic Interview for Psychosis)                    |
| <b>Libido</b>                                   | 11             | libD                | DIP depression (Diagnostic Interview for Psychosis)                    |
| <b>Poor appetite</b>                            | 11             | paD                 | DIP depression (Diagnostic Interview for Psychosis)                    |
| <b>Increased appetite</b>                       | 11             | inaD                | DIP depression (Diagnostic Interview for Psychosis)                    |
| <b>Weight loss</b>                              | 11             | wloD                | DIP depression (Diagnostic Interview for Psychosis)                    |
| <b>Weight gain</b>                              | 11             | wgaD                | DIP depression (Diagnostic Interview for Psychosis)                    |
| <b>Insomnia (early in the night)</b>            | 11             | iinD                | DIP depression (Diagnostic Interview for Psychosis)                    |
| <b>Insomnia (middle of the night)</b>           | 11             | minD                | DIP depression (Diagnostic Interview for Psychosis)                    |
| <b>Early waking</b>                             | 11             | ewD                 | DIP depression (Diagnostic Interview for Psychosis)                    |
| <b>Excessive sleep</b>                          | 11             | esD                 | DIP depression (Diagnostic Interview for Psychosis)                    |
| <b>Excessive self-guilt</b>                     | 11             | esgD                | DIP depression (Diagnostic Interview for Psychosis)                    |
| <b>Nihilistic</b>                               | 10             | denD                | DIP depression (Diagnostic Interview for Psychosis)                    |
| <b>Elevated mood</b>                            | 11             | elMa                | DIP mania (Diagnostic Interview for Psychosis)                         |
| <b>Irritable mood</b>                           | 11             | irMa                | DIP mania (Diagnostic Interview for Psychosis)                         |
| <b>Auditory</b>                                 | 10             | auH                 | DIP hallucination (Diagnostic Interview for Psychosis)                 |
| <b>Visual</b>                                   | 10             | viH                 | DIP hallucination (Diagnostic Interview for Psychosis)                 |

|                                                                  |    |        |                                                                      |
|------------------------------------------------------------------|----|--------|----------------------------------------------------------------------|
| <b>Olfactory</b>                                                 | 10 | olfH   | DIP hallucination (Diagnostic Interview for Psychosis)               |
| <b>Somatic</b>                                                   | 10 | somH   | DIP hallucination (Diagnostic Interview for Psychosis)               |
| <b>Sexual</b>                                                    | 10 | she    | DIP hallucination (Diagnostic Interview for Psychosis)               |
| <b>All modalities</b>                                            | 10 | amH    | DIP hallucination (Diagnostic Interview for Psychosis)               |
| <b>Nonverbal</b>                                                 | 10 | nvH    | DIP hallucination (Diagnostic Interview for Psychosis)               |
| <b>Abusive</b>                                                   | 10 | abH    | DIP hallucination (Diagnostic Interview for Psychosis)               |
| <b>Commentary</b>                                                | 10 | comH   | DIP hallucination (Diagnostic Interview for Psychosis)               |
| <b>Third person</b>                                              | 10 | tpH    | DIP hallucination (Diagnostic Interview for Psychosis)               |
| <b>Insertion</b>                                                 | 10 | insT   | DIP Subjective thought disorder (Diagnostic Interview for Psychosis) |
| <b>Broadcasting</b>                                              | 10 | broT   | DIP Subjective thought disorder (Diagnostic Interview for Psychosis) |
| <b>Withdrawal</b>                                                | 10 | wiT    | DIP Subjective thought disorder (Diagnostic Interview for Psychosis) |
| <b>Echolalia</b>                                                 | 10 | echT   | DIP Subjective thought disorder (Diagnostic Interview for Psychosis) |
| <b>Passivity</b>                                                 | 10 | paDe   | DIP delusion (Diagnostic Interview for Psychosis)                    |
| <b>Persecutory</b>                                               | 10 | pscDe  | DIP delusion (Diagnostic Interview for Psychosis)                    |
| <b>Influence</b>                                                 | 10 | infDe  | DIP delusion (Diagnostic Interview for Psychosis)                    |
| <b>Perception</b>                                                | 10 | perDe  | DIP delusion (Diagnostic Interview for Psychosis)                    |
| <b>Grandiose</b>                                                 | 1  | graDe  | DIP delusion (Diagnostic Interview for Psychosis)                    |
| <b>Bizarre</b>                                                   | 10 | bizDe  | DIP delusion (Diagnostic Interview for Psychosis)                    |
| <b>Lack of insight</b>                                           | 3  | insLa  | DIP insight (Diagnostic Interview for Psychosis)                     |
| <b>Organized delusions</b>                                       | 10 | orgPs  | DIP psychotic symptoms (Diagnostic Interview for Psychosis)          |
| <b>Widespread delusions</b>                                      | 10 | wsPs   | DIP psychotic symptoms (Diagnostic Interview for Psychosis)          |
| <b>one week (Delusions and concurrent hallucinations period)</b> | 10 | owPs   | DIP psychotic symptoms (Diagnostic Interview for Psychosis)          |
| <b>Jealous delusions</b>                                         | 10 | jePs   | DIP psychotic symptoms (Diagnostic Interview for Psychosis)          |
| <b>Alcohol – ever used</b>                                       | 1  | aleAlc | DIP alcohol (Diagnostic Interview for Psychosis)                     |
| <b>Frequency of alcohol use</b>                                  | 1  | freAlc | DIP alcohol (Diagnostic Interview for Psychosis)                     |
| <b>Heavier frequency (6 or more drinks /time)</b>                | 1  | hfAlc  | DIP alcohol (Diagnostic Interview for Psychosis)                     |
| <b>Difficulty reducing alcohol use</b>                           | 1  | cdAlc  | DIP alcohol (Diagnostic Interview for Psychosis)                     |
| <b>Guilt associated with alcohol use</b>                         | 1  | glAlc  | DIP alcohol (Diagnostic Interview for Psychosis)                     |
| <b>Criticism associated with alcohol use</b>                     | 1  | criAlc | DIP alcohol (Diagnostic Interview for Psychosis)                     |
| <b>Morning alcohol consumption</b>                               | 1  | mrAlc  | DIP alcohol (Diagnostic Interview for Psychosis)                     |
| <b>Risk taking to acquire alcohol</b>                            | 1  | rtAlc  | DIP alcohol (Diagnostic Interview for Psychosis)                     |
| <b>Craving</b>                                                   | 1  | craAlc | DIP alcohol (Diagnostic Interview for Psychosis)                     |
| <b>Capacity to control alcohol intake</b>                        | 1  | ctcAlc | DIP alcohol (Diagnostic Interview for Psychosis)                     |
| <b>Tolerance</b>                                                 | 1  | tfrAlc | DIP alcohol (Diagnostic Interview for Psychosis)                     |
| <b>Withdrawal problems</b>                                       | 1  | wpAlc  | DIP alcohol (Diagnostic Interview for Psychosis)                     |
| <b>Social legal problems</b>                                     | 1  | slpAlc | DIP alcohol (Diagnostic Interview for Psychosis)                     |
| <b>Drugs ever used</b>                                           | 1  | dreDr  | DIP drug (Diagnostic Interview for Psychosis)                        |
| <b>Tobacco ever used</b>                                         | 1  | tbeDr  | DIP drug (Diagnostic Interview for Psychosis)                        |
| <b>Drug abuse</b>                                                | 1  | abDr   | DIP drug (Diagnostic Interview for Psychosis)                        |
| <b>Lifetime alcohol use</b>                                      | 1  | ltaDr  | DIP drug (Diagnostic Interview for Psychosis)                        |
| <b>Psychopathology linked to alcohol use</b>                     | 1  | ppaDr  | DIP drug (Diagnostic Interview for Psychosis)                        |
| <b>Lifetime cannabis use</b>                                     | 1  | ltcDr  | DIP drug (Diagnostic Interview for Psychosis)                        |
| <b>Psychopathology linked to cannabis use</b>                    | 1  | ppcDr  | DIP drug (Diagnostic Interview for Psychosis)                        |
| <b>Lifetime use of other drugs</b>                               | 1  | ltoDr  | DIP drug (Diagnostic Interview for Psychosis)                        |
| <b>Psychopathology linked to other drugs</b>                     | 1  | ppoDr  | DIP drug (Diagnostic Interview for Psychosis)                        |
| <b>Agitated</b>                                                  | 2  | agiBe  | DIP behavior affect (Diagnostic Interview for Psychosis)             |
| <b>Catatonia</b>                                                 | 2  | cttBe  | DIP behavior affect (Diagnostic Interview for Psychosis)             |
| <b>Bizarre</b>                                                   | 1  | bizBe  | DIP behavior affect (Diagnostic Interview for Psychosis)             |
| <b>Restricted</b>                                                | 3  | reBe   | DIP behavior affect (Diagnostic Interview for Psychosis)             |
| <b>Blunted</b>                                                   | 3  | bluBe  | DIP behavior affect (Diagnostic Interview for Psychosis)             |
| <b>Inappropriate</b>                                             | 2  | inaBe  | DIP behavior affect (Diagnostic Interview for Psychosis)             |
| <b>Speech pressure</b>                                           | 2  | preS   | DIP speech (Diagnostic Interview for Psychosis)                      |
| <b>Speech difficulties</b>                                       | 3  | difS   | DIP speech (Diagnostic Interview for Psychosis)                      |
| <b>Speech - positive thought disorder</b>                        | 2  | ptdS   | DIP speech (Diagnostic Interview for Psychosis)                      |
| <b>Speech incoherence</b>                                        | 3  | ichS   | DIP speech (Diagnostic Interview for Psychosis)                      |

|                                              |   |       |                                                  |
|----------------------------------------------|---|-------|--------------------------------------------------|
| <b>Speech – negative thought disorder</b>    | 3 | ntdS  | DIP speech (Diagnostic Interview for Psychosis)  |
| <b>Blunted affect – facial expression</b>    | 3 | bafSa | SANS (Scale for Assessment of Negative Symptoms) |
| <b>Blunted affect – spontaneous movement</b> | 3 | basSa | SANS (Scale for Assessment of Negative Symptoms) |
| <b>Blunted affect – gestures</b>             | 3 | bagSa | SANS (Scale for Assessment of Negative Symptoms) |
| <b>Blunted affect – eye contact</b>          | 3 | baeSa | SANS (Scale for Assessment of Negative Symptoms) |
| <b>Blunted affect – responsivity</b>         | 3 | banSa | SANS (Scale for Assessment of Negative Symptoms) |
| <b>Blunted affect – inappropriate</b>        | 2 | baiSa | SANS (Scale for Assessment of Negative Symptoms) |
| <b>Blunted affect – vocal inflections</b>    | 3 | bavSa | SANS (Scale for Assessment of Negative Symptoms) |
| <b>Blunted affect – overall</b>              | 3 | baSa  | SANS (Scale for Assessment of Negative Symptoms) |
| <b>Alogia – speech poverty</b>               | 3 | alpSa | SANS (Scale for Assessment of Negative Symptoms) |
| <b>Alogia – speech content</b>               | 3 | alcSa | SANS (Scale for Assessment of Negative Symptoms) |
| <b>Alogia – blocking</b>                     | 3 | albSa | SANS (Scale for Assessment of Negative Symptoms) |
| <b>Alogia – latency response</b>             | 3 | allSa | SANS (Scale for Assessment of Negative Symptoms) |
| <b>Alogia – overall</b>                      | 3 | aloSa | SANS (Scale for Assessment of Negative Symptoms) |
| <b>Avolition – grooming</b>                  | 3 | avgSa | SANS (Scale for Assessment of Negative Symptoms) |
| <b>Avolition – persistence</b>               | 3 | aviSa | SANS (Scale for Assessment of Negative Symptoms) |
| <b>Avolition – physical anergia</b>          | 3 | avpSa | SANS (Scale for Assessment of Negative Symptoms) |
| <b>Avolition – overall</b>                   | 3 | avoSa | SANS (Scale for Assessment of Negative Symptoms) |
| <b>Asociality – recreational</b>             | 3 | asrSa | SANS (Scale for Assessment of Negative Symptoms) |
| <b>Asociality – sexual/activity</b>          | 3 | assSa | SANS (Scale for Assessment of Negative Symptoms) |
| <b>Asociality – intimacy</b>                 | 3 | asiSa | SANS (Scale for Assessment of Negative Symptoms) |
| <b>Asociality – relationships</b>            | 3 | areSa | SANS (Scale for Assessment of Negative Symptoms) |
| <b>Asociality – overall</b>                  | 3 | asoSa | SANS (Scale for Assessment of Negative Symptoms) |
| <b>Global functioning score</b>              | 3 | Gaf   | GAF (Global Assessment Functioning)              |

\*Module: 1. Substance abuse; 2. Disorganized speech and behavior; 3. Negative symptoms; 8. Cognitive symptoms (visuospatial perception); 9. Cognitive symptoms (general intelligence); 10. Positive symptoms; 11. Depressive symptoms.

\*DIP drug scales including amphetamine, cannabis, cocaine, ecstasy, heroin, inhalants solvents, LSD, tranquilizer were removed in data processing due to high missing data rate.

**Items removed due to low correlation coefficients and form modules disconnected to the network**

| Items                           | Modules | Symptom scales                                                         |
|---------------------------------|---------|------------------------------------------------------------------------|
| <b>List recall</b>              | 4       | RBANS (Repeatable Battery for Assessment of Neuropsychological Status) |
| <b>Delusions of poverty</b>     | 5       | DIP depression (Diagnostic Interview for Psychosis)                    |
| <b>Primary</b>                  | 6       | DIP delusions (Diagnostic Interview for Psychosis)                     |
| <b>Antipsychotics – insight</b> | 7       | DIP insight (Diagnostic Interview for Psychosis)                       |

**Supplementary Table 2. Similarity in betweenness centrality across sites**

| r         | Sydney<br>(n=123) | Melbourne<br>(n=148) | Brisbane<br>(n=168) | Perth<br>(n=163) | Newcastle<br>(n=47) |
|-----------|-------------------|----------------------|---------------------|------------------|---------------------|
| Sydney    | 1.000             | 0.1434               | 0.2765*             | 0.2364*          | 0.1750*             |
| Melbourne |                   | 1.000                | 0.2321*             | 0.1182           | 0.1109              |
| Brisbane  |                   |                      | 1.000               | 0.1621           | 0.2058*             |
| Perth     |                   |                      |                     | 1.000            | 0.1444              |
| Newcastle |                   |                      |                     |                  | 1.000               |

Values represent correlation coefficients and \* denotes significance (p<0.05)

**Supplementary Table 3. Similarity in closeness centrality across sites**

| r         | Sydney<br>(n=123) | Melbourne<br>(n=148) | Brisbane<br>(n=168) | Perth<br>(n=163) | Newcastle<br>(n=47) |
|-----------|-------------------|----------------------|---------------------|------------------|---------------------|
| Sydney    | 1.000             | 0.6933*              | 0.6343 *            | 0.5177*          | 0.3091*             |
| Melbourne |                   | 1.000                | 0.6786*             | 0.4837*          | 0.4002*             |
| Brisbane  |                   |                      | 1.000               | 0.5967*          | 0.4073*             |
| Perth     |                   |                      |                     | 1.000            | 0.3544*             |
| Newcastle |                   |                      |                     |                  | 1.000               |

Values represent correlation coefficients and \* denotes significance (p<0.05)

**Supplementary Table 4. Similarity in degree centrality across sites**

|           | Sydney<br>(n=123) | Melbourne<br>(n=148) | Brisbane<br>(n=168) | Perth<br>(n=163) | Newcastle<br>(n=47) |
|-----------|-------------------|----------------------|---------------------|------------------|---------------------|
| Sydney    | 1.000             | 0.6855*              | 0.6937*             | 0.5947*          | 0.3815*             |
| Melbourne |                   | 1.000                | 0.6977*             | 0.5463*          | 0.4643*             |
| Brisbane  |                   |                      | 1.000               | 0.6458*          | 0.4001*             |
| Perth     |                   |                      |                     | 1.000            | 0.4060*             |
| Newcastle |                   |                      |                     |                  | 1.000               |

Values represent correlation coefficients and \* denotes significance (p<0.05)

**Supplementary Table 5. Similarity in centrality measures across males and females**

|                | betweenness | closeness | degree |
|----------------|-------------|-----------|--------|
| Male (n=433)   |             |           |        |
| Female (n=209) | 0.088       | 0.665*    | 0.730* |

Values represent correlation coefficients and \* denotes significance (p<0.05)

**Supplementary Table 6. Similarity between the LASSO network and Pearson network.**

| Similarity | betweenness | closeness | degree |
|------------|-------------|-----------|--------|
| gamma=0.3  | 0.046       | 0.265*    | 0.444* |

Values represent correlation coefficients and \* denotes significance (p<0.05)

Supplementary Table 7. Cohen's d effect size for each between-group comparison

| # of components | Duration of illness |         |           | Positive Symptom Severity |            |           |
|-----------------|---------------------|---------|-----------|---------------------------|------------|-----------|
|                 | t-value             | p-value | Cohen's d | t-value                   | p-value    | Cohen's d |
| 1 and 2         | -1.4371             | 0.1512  | 0.1440    | 3.8173                    | 1.4861e-04 | 0.3825    |
| 2 and 3         | -1.3642             | 0.1745  | 0.2895    | 1.4670                    | 0.1445     | 0.3113    |
| 1 and 3         | -2.3311             | 0.0201  | 0.4608    | 3.4391                    | 6.3093e-04 | 0.6798    |

Supplementary Table 8. GLM results across different thresholds to define ranked symptoms as 'severe'

| GLM analyses                                      | Classified as severe symptoms (%) |                     |                     |
|---------------------------------------------------|-----------------------------------|---------------------|---------------------|
|                                                   | Top 10%<br><i>t</i>               | Top 15%<br><i>t</i> | Top 20%<br><i>t</i> |
| Impact of clustering on positive symptom severity | -5.306*                           | -5.467*             | -5.827*             |
| Impact of clustering on illness duration          | 3.036*                            | 2.688*              | 2.080*              |

Values represent correlation coefficients and \* denotes significance (p<0.05)

## Exploring the potential confound of study site.

Supplementary analyses were performed to further ameliorate potential site effects and to establish the reliability of our findings. First, a leave-one-site-out cross-validation was conducted by partitioning the symptom data by study site. In each fold, a single site was left out and a symptom comorbidity network was mapped using subjects from the remaining sites. The left-out subjects from one site were then projected onto the network to determine their number of active modules. This was repeated for each site. At the end of this leave-out-one-site cross-validation procedure, we were left with an out-of-sample estimate of the number of active modules for each subject. The GLM results reproduced the main findings: a significant linear increase in the number of connected components as a function of illness duration ( $t=2.818$ ,  $\beta=1.309$ ,  $p=0.005$ ), as well as a significant decrease in the number of connected components with positive symptom severity ( $t=-5.297$ ,  $\beta=-0.868$ ,  $p<0.001$ ). Similarly, results from repeating the canonical correlation analysis (CCA) in a leave-one-site-out cross-validation framework were consistent with findings from the main CCA. Specifically, the degree of symptom clustering was significantly and positively correlated to regional FA values ( $r=0.65$ ,  $p<0.001$ , bootstrap=5000).

We further repeated our analyses after simply controlling for study site. Consistent with the main findings, GLM analyses yielded a significant linear increase in the number of connected components as a function of illness duration ( $t=2.218$ ,  $\beta=1.654$ ,  $p=0.027$ ), as well as a significant linear decrease in the number of connected components with positive symptom severity ( $t=-4.915$ ,  $\beta=-1.268$ ,  $p<0.001$ ), after controlling for study site and the number of active symptom modules. Results from repeating the CCA after controlling for study site were also consistent with the main findings, such that increased symptom clustering significantly covaried with decreased regional FA values ( $r=0.59$ ,  $p=0.049$ , bootstrap=5000).
